# Supplementary figures and images for: Repetitive Neuronal Activation Regulates Cellular Maturation State via Nuclear Reprogramming
Source: Research Square preprint supplement (doi:10.21203/rs.3.rs-6578240/v1), 2025-05-19

Pathway analysis  
(RNA-seq; Fig1C)

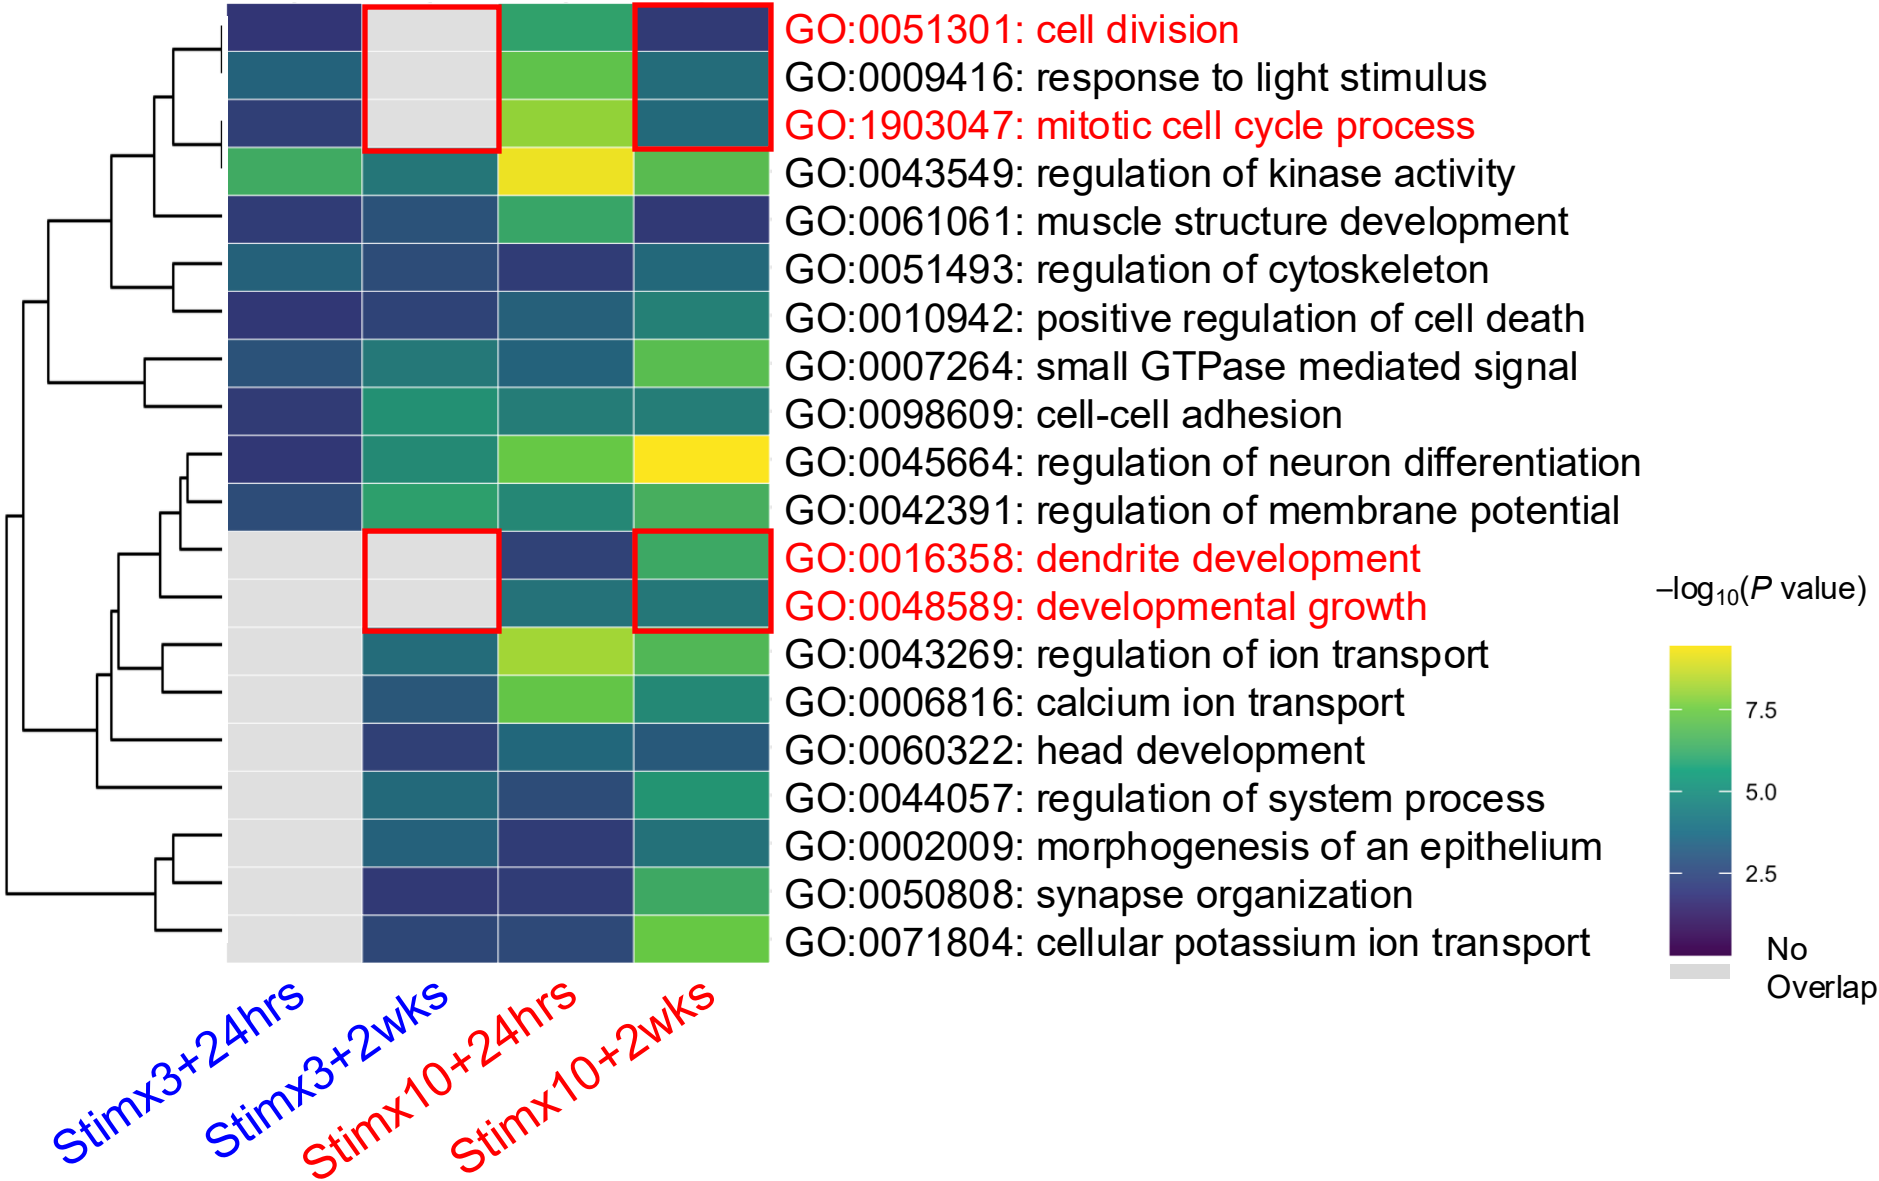

Supplement: Supplementary file 1 [file 7f06ebfc053b2338feb37e81.pdf]

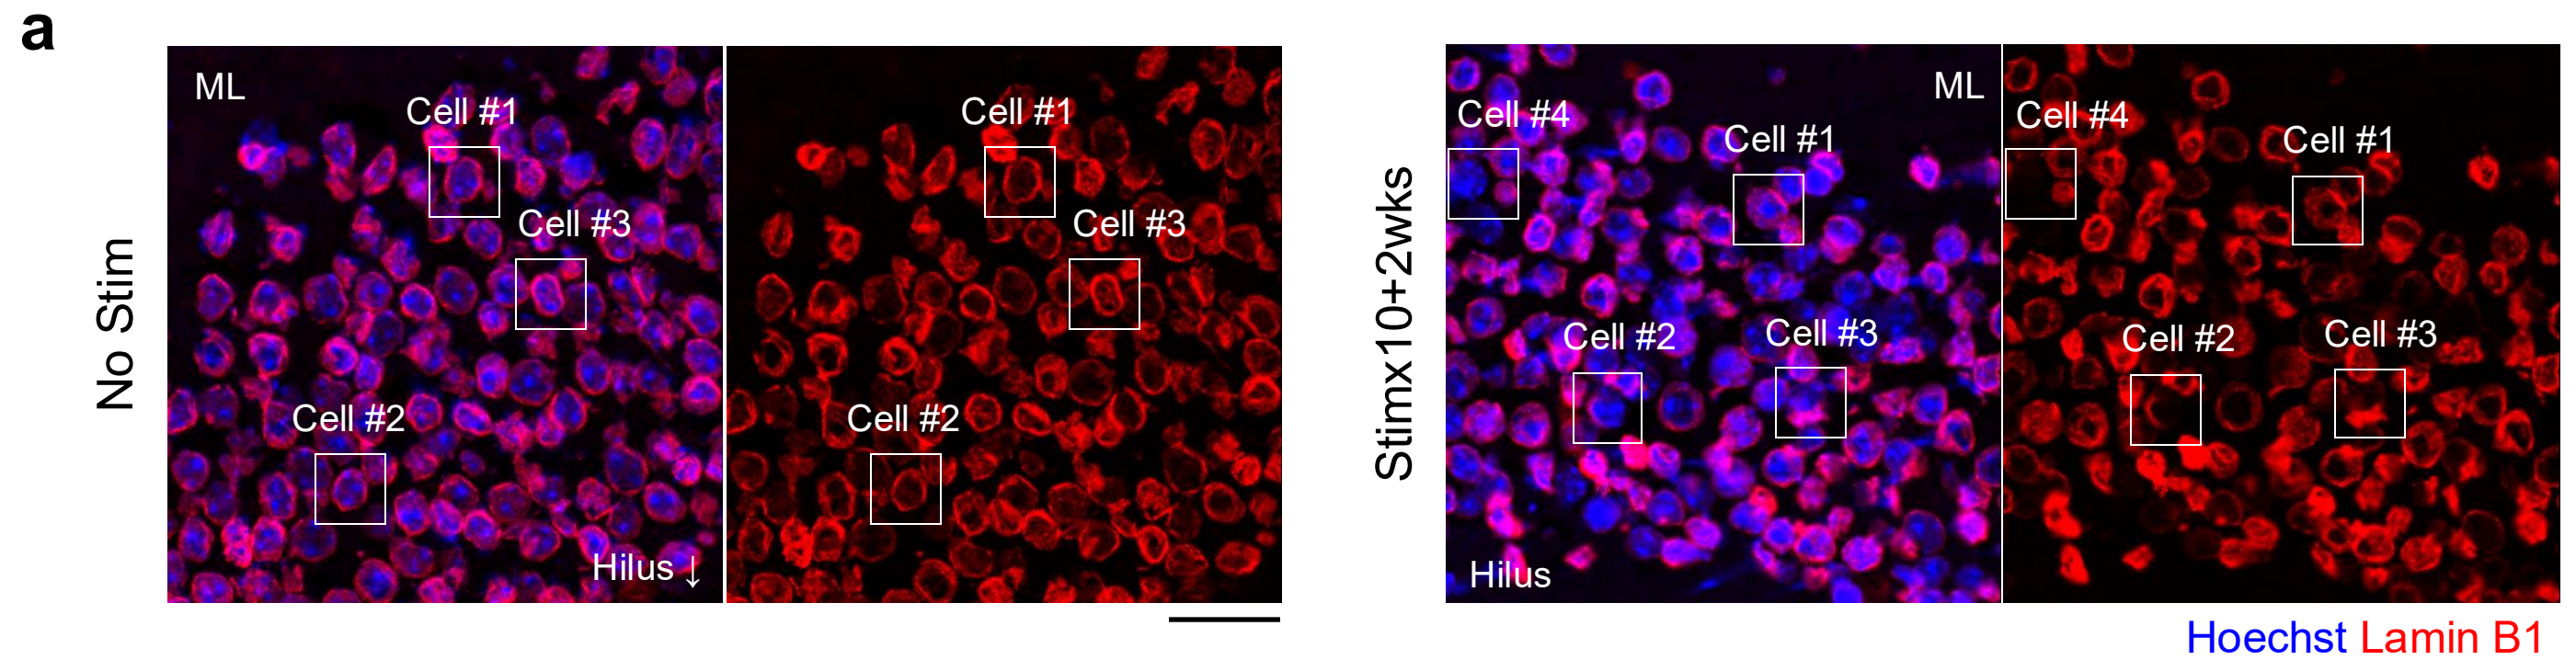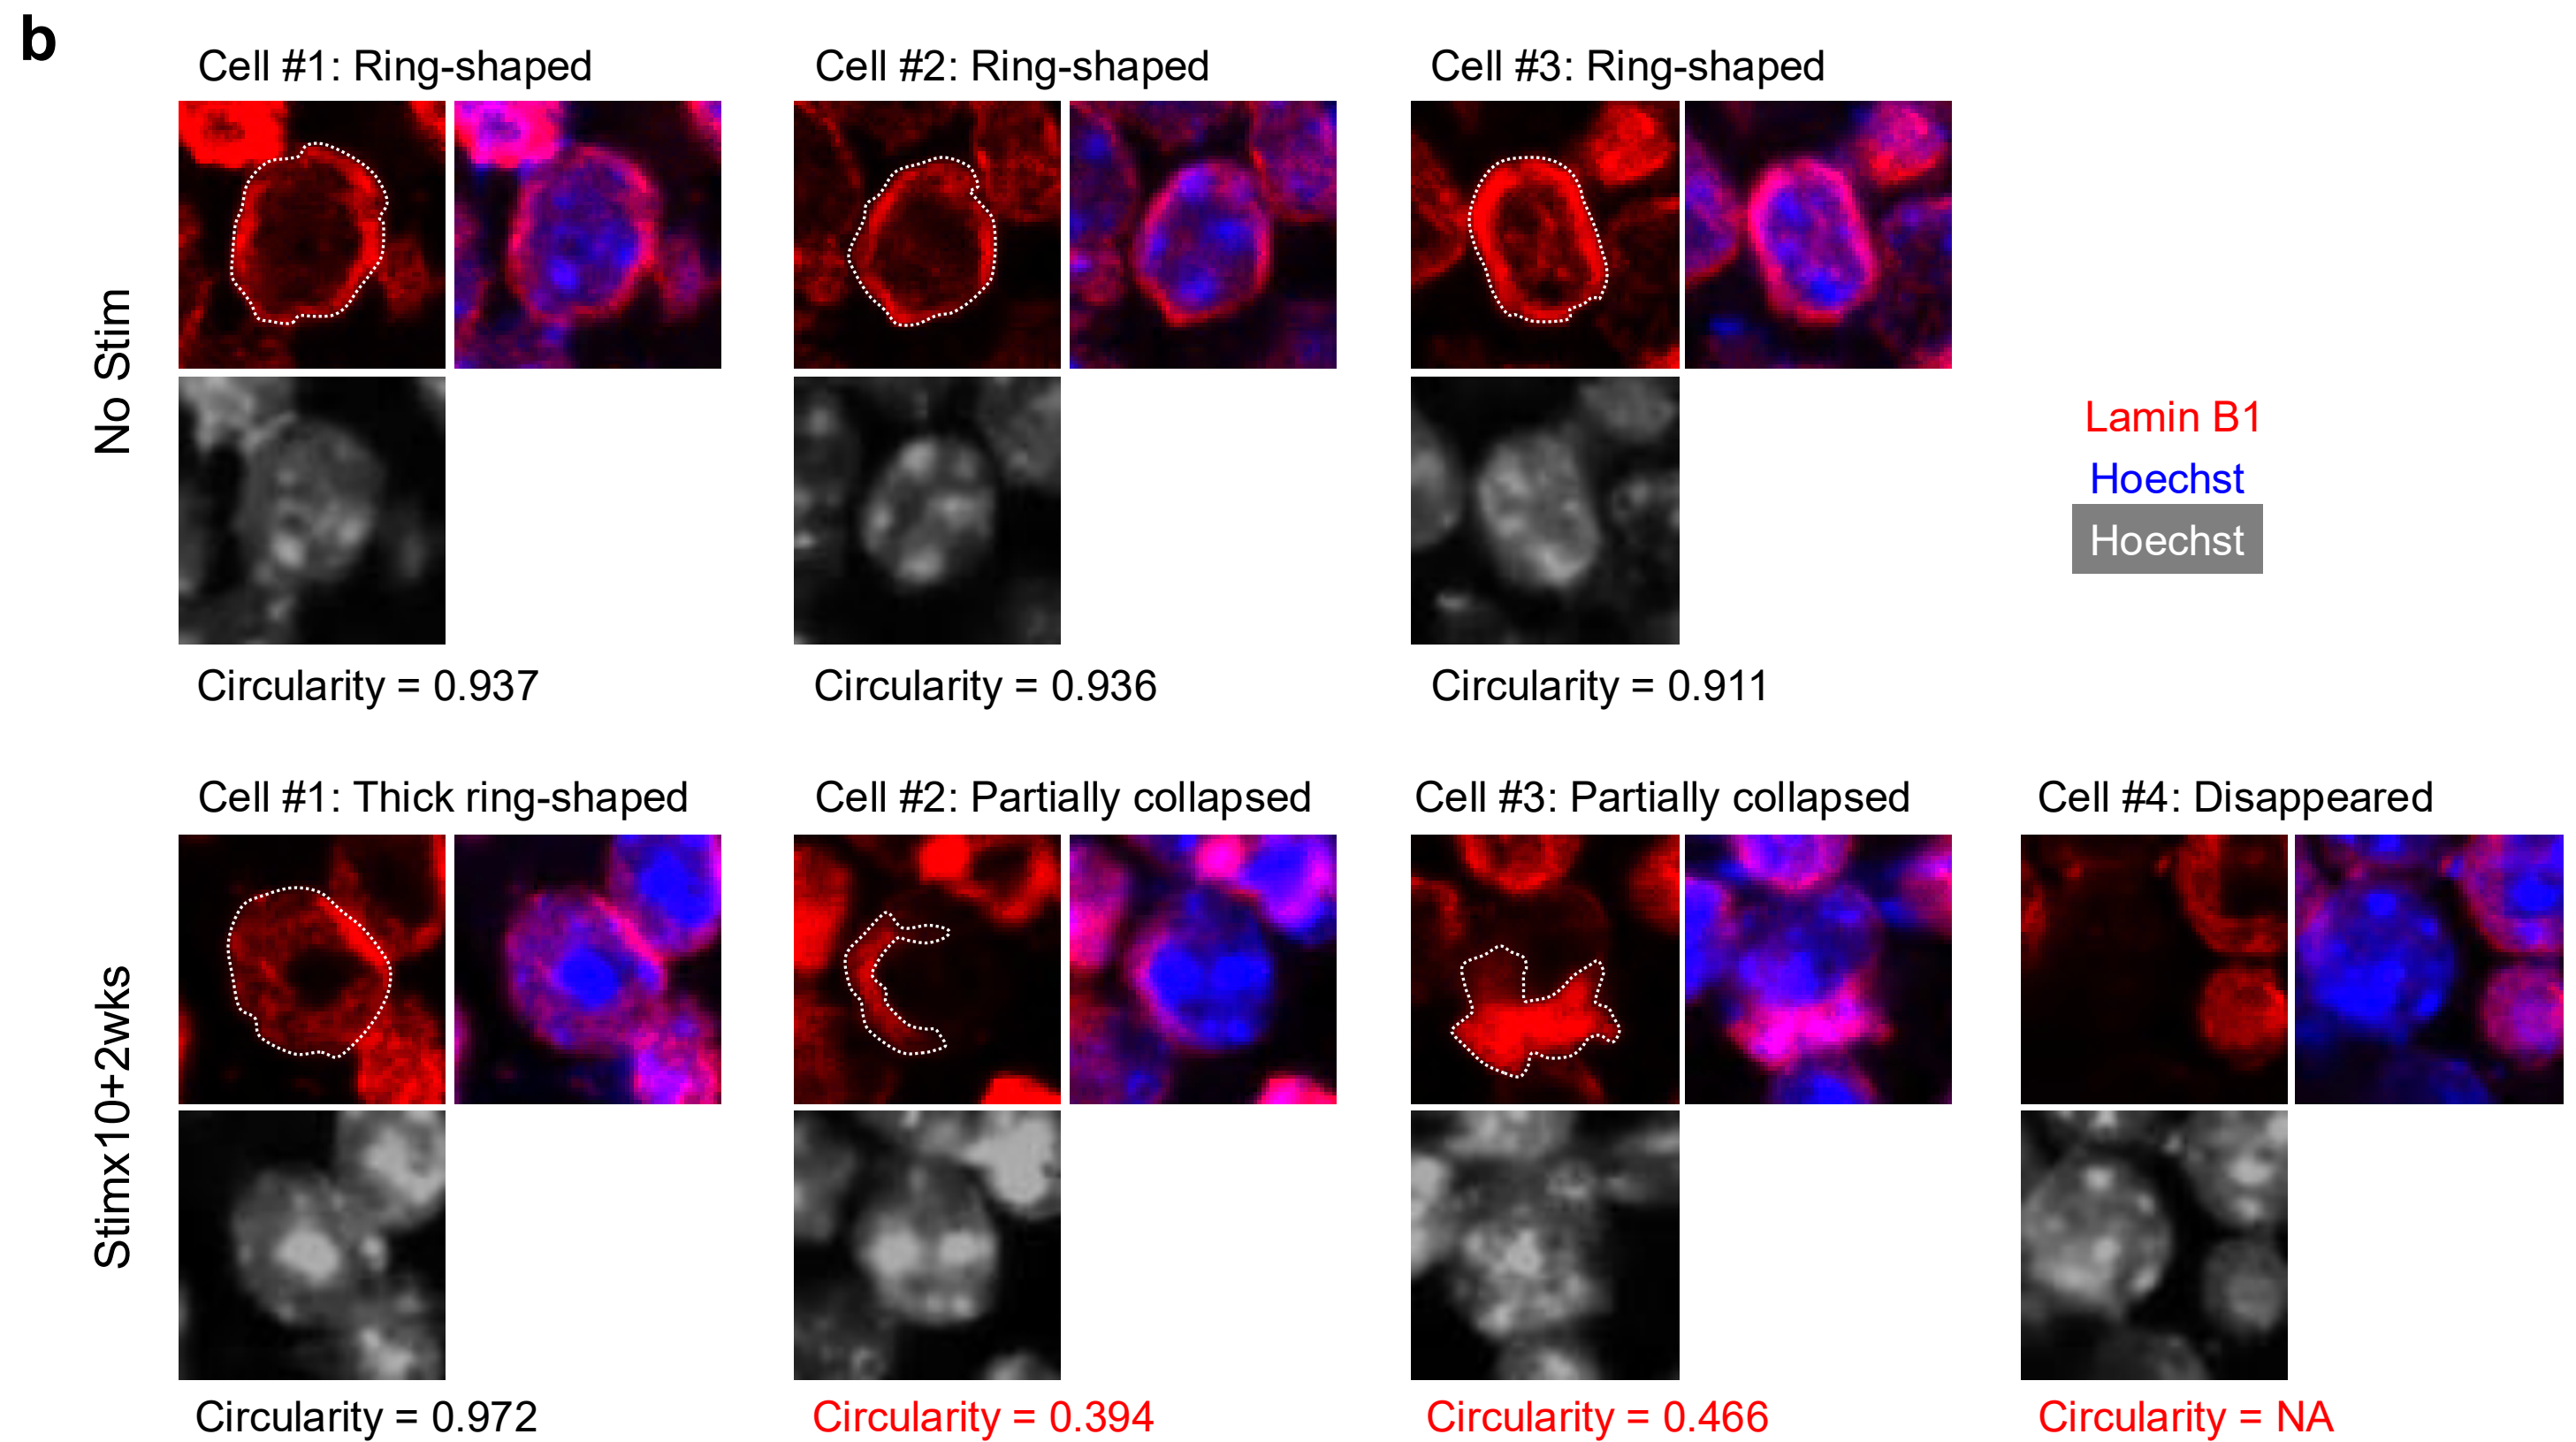

Supplement: Supplementary file 2 [file c58b642864dfbcfa76078c07.pdf]
